# Supplementary material for: Operando laser scattering: probing the evolution of local pH gradients on complex electrode architectures
Source: Research Square preprint supplement (doi:10.21203/rs.3.rs-257579/v1), 2021-03-03
Supplement: Supplementary file 1 [file e116c3574cf2c2694ee4433a.docx]

Supplementary Information for

***Operando* laser scattering: probing the evolution of local pH gradients on complex electrode architectures**

Vitali Grozovski1, Pavel Moreno-García1,*, Elea Karst1, María de Jesús Gálvez-Vázquez1, Alexander Fluegel2, Sathana Kitayaporn3, Soma Vesztergom4, & Peter Broekmann1,*

1Department of Chemistry, Biochemistry and Pharmaceutical Sciences, University of Bern, Freiestrasse 3, Bern 3012, Switzerland

2BASF SE, Global Business Unit Electronic Materials, Ludwigshafen 67056, Germany

3BASF Corporation, Global Business Unit Electronic Materials, Hillsboro, Oregon 97124, United States

4Department of Physical Chemistry, Eötvös Loránd University, Budapest, 1117, Hungary

Correspondence and requests for materials should be addressed to P.M.-G. and P.B. (email: [pavel.moreno@dcb.unibe.ch](file:///D:\backup_20210110\Daten\Vitali\Co_HER_paper_Mai2020\manuscript\for_submission\pavel.moreno@dcb.unibe.ch), [peter.broekmann@dcb.unibe.ch](file:///D:\backup_20210110\Daten\Vitali\Co_HER_paper_Mai2020\manuscript\for_submission\peter.broekmann@dcb.unibe.ch))


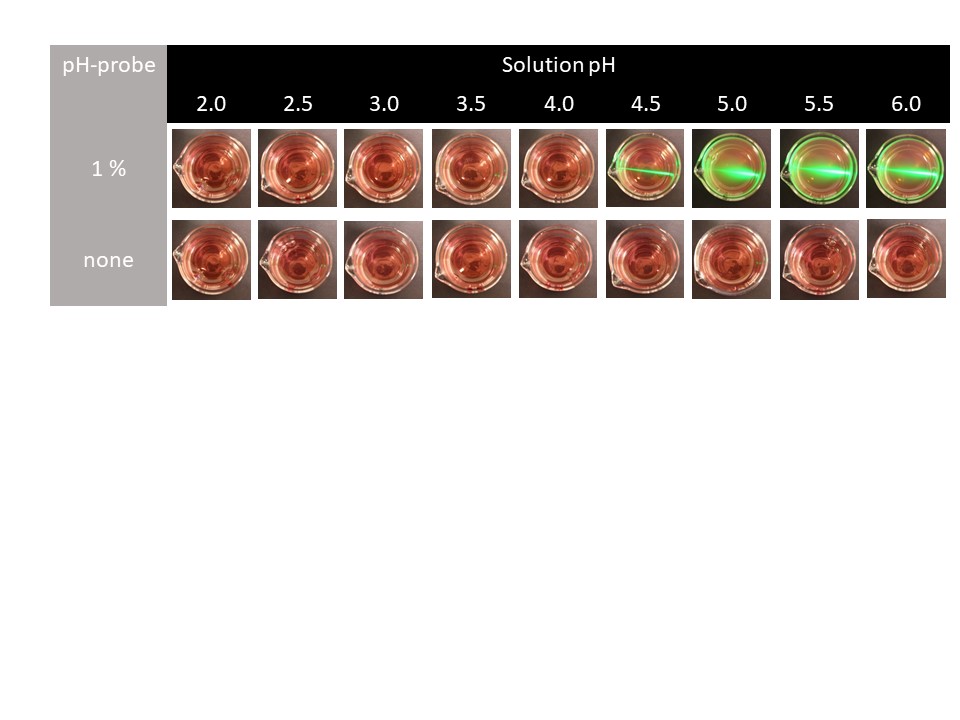


**Supplementary Fig. 1** **Beaker-scale TE experiments**. A green laser beam (532 ± 10 nm, 5 mW, beam diam. 2.5 mm) is passed through a series of inhibitor- and pH-probe-containing Co plating baths (50 mM Co2SO4 in 0.5 M H3BO3) with pH values ranging from 2 to 6. Control experiments carried out with plating solutions containing no pH-probe are also shown.


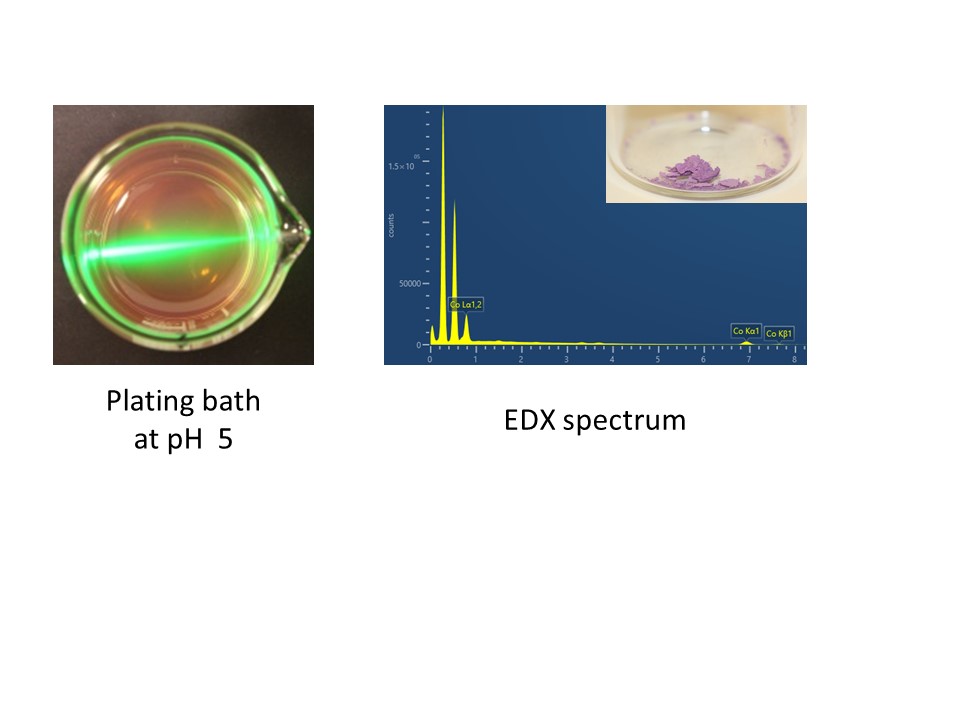


**Supplementary Fig. 2** **Beaker-scale pH-probe precipitation experiments**. The precipitate was obtained from the pH-probe- and inhibitor-containing plating solution upon removal of the solvent and subsequent filtration. The plating solution was 50 mM Co2SO4 in 0.5 M H3BO3 with pH 5. The presence of Co species in the isolated precipitate was confirmed by EDX elementary analysis.


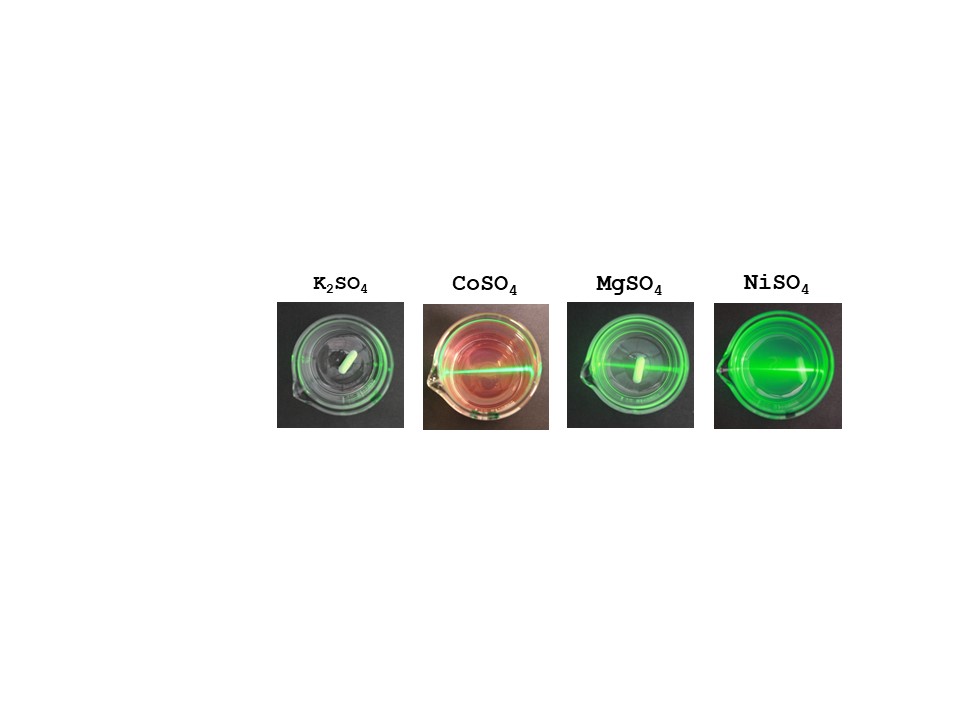


**Supplementary Fig. 3** **Beaker-scale TE experiments using distinct cations at pH 5**. Precipitation phenomena are observed only when divalent cations are present in the plating bath. This confirms that complexation of the pH-probe at pH > 4.5 is mediated by Co2+ species in superconformal CoED.


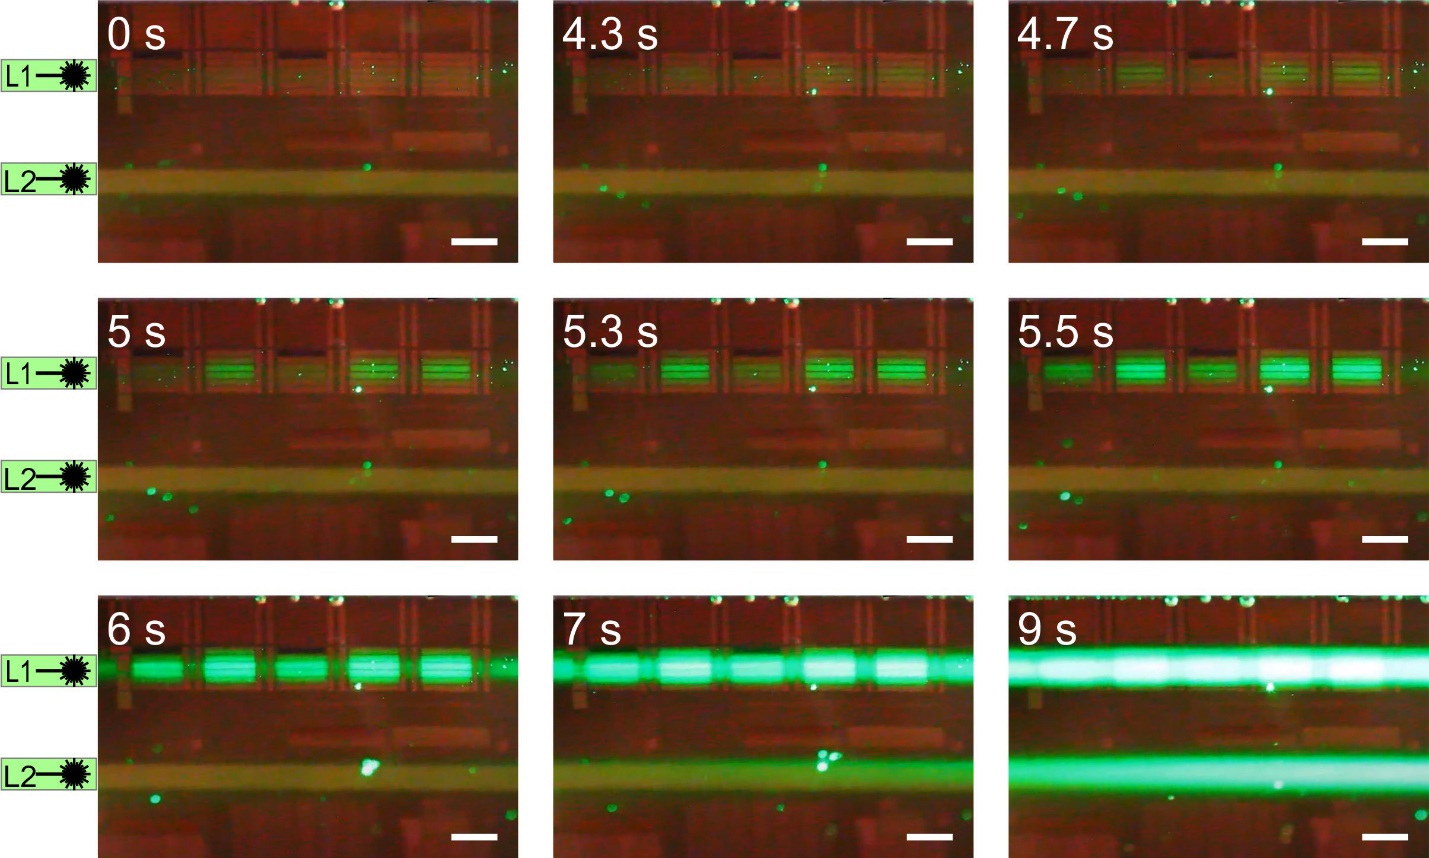


**Supplementary Fig. 4** **Time-evolution of TE enhancement on the surface of a patterned Si die during superconformal galvanostatic CoED experiments at 100 rpm solution stirring**. Selected screenshots captured at different stages of the superconformal Co electrodeposition process by a camera placed in front of the Si die. The labels on the upper left corner of each subpanel indicate the time elapsed after the galvanostatic metal deposition was started. Scale bars: 1000 m for all panels. The plating bath contained both inhibitor additive and pH-probe and the CoED was conducted at *j* = –1 mA cm-2 and 100 rpm. Each adjacent patterned domain probed by L1 comprises an area of 0.265 mm2 and is separated from the closest neighbours by 50 m. The enhancement of the Tyndall effect occurs at earlier stages in comparison to the experiment described in Fig. 4 (at 300 rpm) because the mass transport limitations for the H+ ion is more substantial at gentler stirring rates. Videos of TE enhancement from pH-probe aggregation experiments at 300 and 100 rpm are also provided.

Videos S4.mp4 and Fig4.mp4


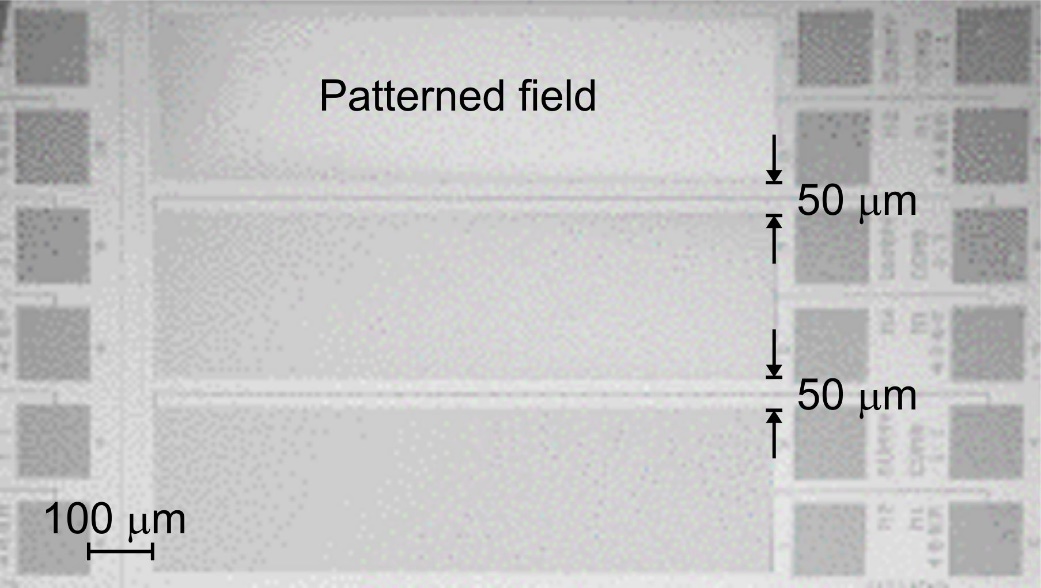


**Supplementary Fig. 5** **Geometry and characteristic dimensions of the patterned domains that were scrutinized by L1.** The parallel patterned domains that in the probed surface regions are separated from each other by 50 m spacings are accurately resolved by the TE-based colorimetry approach. The SEM image shows three parallel patterned domains.


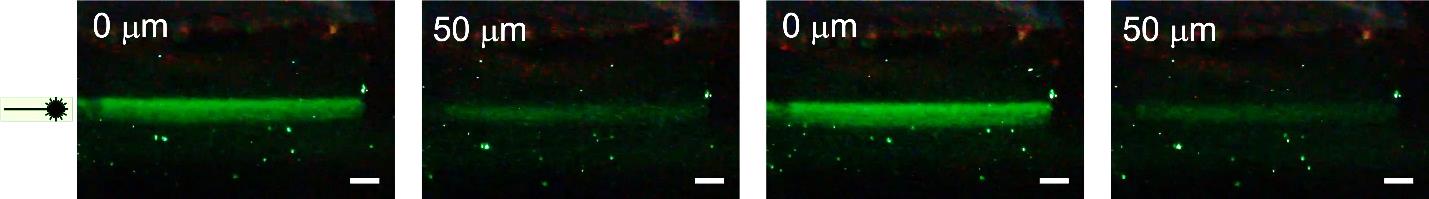


**Supplementary Fig. 6** **TE-based colorimetry experiments with alternating approaching and retracting cycles of the laser probe from the sample surface.** The pictures were sequentially taken at advanced stages of the CoED when the surface pH had already surpassed the critical pH > 4.5. The intensity of the TE enhancement is clearly observed when the laser probe is positioned adjacent to the sample surface only. These control investigations were carried out on a non-patterned Co-seeded coupon. This confirms that the observed pH dynamics and resulting agglomeration presented in the main text originate from surface-confined processes. Scale bar: 1000 m.

Video S6.mp4


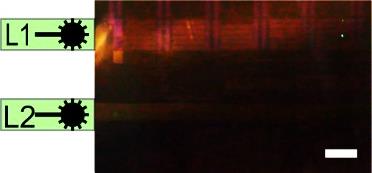


**Supplementary Fig. 7** **TE-based colorimetry experiments with pH-probe-free plating electrolyte.** No TE enhancement was observed throughout the CoED experiment. This confirms that the observed agglomeration presented in the main text originate from surface-confined electrochemically-driven pH-probe complexation and subsequent precipitation. Scale bar: 1000 m.

Video S7.mp4


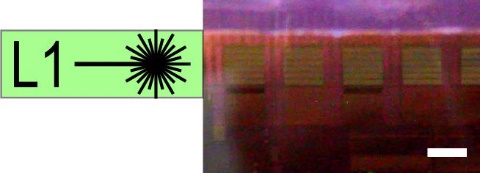


**Supplementary Fig. 8** **TE-based colorimetry experiments in the absence of electrochemically-driven processes.** No TE enhancement other than that one due to background events was observed when no net charge was transferred through the solid-liquid interface. This confirms that the observed pH dynamics and resulting agglomeration presented in the main text originate from electrochemically-driven processes. Scale bar: 1000 m.

Video S8.mp4

**Finite element-based numerical simulations**

In order to explain a possible mechanism of the Tyndall effect enhancement observed in Fig. 4 in the main text, numerical simulations utilizing the finite element method were employed. The simulations were carried out on a two-dimensional grid with a mesh resolution of 10 μm. The 600 μm wide, planar electrode that contained a 240 μm broad segment representing a patterned area was assumed to lie at the bottom of the simulation grid. Translational symmetry perpendicular to the simulation plane, as well as periodic boundaries in the lateral direction were assumed.

In the simulation, we treated two electrochemical processes, namely, Co2+ electroreduction,

(1)

and the hydrogen evolution reaction (HER), which was assumed to take the form of a 2 e– reduction1, 2,

(2)

It was assumed that the partial current density of cobalt deposition, *j*Co is determined by the Erdey-Grúz–Volmer–Butler equation

(3)

and thus depends linearly on the near-surface cobalt ion concentration .

It was further assumed that the current density of HER is determined as1, 2

(4)

as a sum of anodic and cathodic contributions, where the anodic part depends inversely and the cathodic part linearly on the near-surface hydrogen ion concentration . In Equations (3) and (4) the *k* terms denote reaction rate and the *α* terms charge transfer coefficients and *F*, *R* and *T* denote the Faraday constant, the universal gas constant and the temperature, respectively. In Equation (3), *η*Co denotes the overpotential of cobalt deposition defined as

, (5)

where *E* denotes the electrode potential *vs*. the standard hydrogen electrode and is the standard concentration. These terms appear, with the same meaning, also in Equation (4). In Equation (4) *K*buf denotes a buffer constant, as described in Ref. 2. The actual values of the parameters used in the simulation can be also found in Table V of Ref. 2; values of the *k* reaction rate coefficients were set to 100 times lower values for the non-patterned flat surfaces in order to mimic the blocking effect of the inhibitor additive3.

During simulations, Dirichlet boundary conditions were applied combined with numerical root-finding. That is, at each simulation step, by an initial guess for the value of *E*, new Co2+ and H+ concentrations (and a corresponding current) were calculated for the near-electrode simulation mesh cells using the analytic integrals of Equations (3) and (4). The value of *E* was thus refined to match the current density set in a galvanostatic deposition scenario. Discretized forms of Fick’s diffusion equations,

, (6)

were then solved, using the Crank–Nicolson method4, to propagate concentration changes over the simulation grid. The transport equations were solved for the cobalt ion concentrations and for the concentration difference,

(7)

for which latter term a single diffusion coefficient was assumed. This allowed the consideration of acid-base equilibria in the boric acid buffer containing solution, and an accountable determination of pH profiles, as described in Refs.1, 2, 5. Values of the applied diffusion coefficients are also listed in Table V of Ref. 2; for the present case of a boric acid buffered solution, a *K*buf = 6.9 · 10–8 value was used.

Co2+ concentration and *p*H profiles obtained by the described simulation method, with a set current density of *j* = –1 mA cm–2 that matches the applied experimental value are shown in Fig. 5 of the main text and supplementary Fig. 9, respectively. While we note that no extra efforts have been made to quantitatively refine the model parameter values described in Ref. 2, the simulated results compare remarkably well with photographs of the Tyndall effect shown in Figure 4.


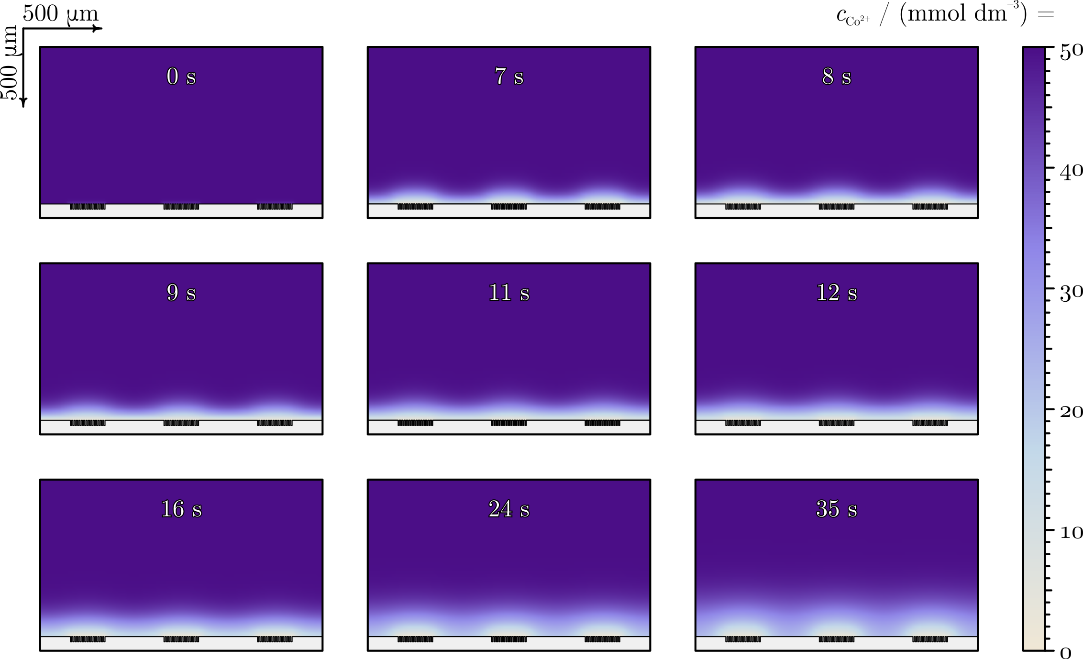


**Supplementary Fig. 9 Simulated Co2+ concentration profiles on a Si die segment comprising three patterned fields.** Selected screenshots of Co2+ concentration profiles captured at different stages of the simulated Co electrodeposition process. The labels on the upper central part of each subpanel indicate the time elapsed after the galvanostatic metal deposition at *j* = –1 mA cm–2 had been started. The initial pH and Co2+ concentration in the plating bath at *t* = 0 was set to 2.5 and 50 mM, respectively. The blocking effect of the inhibitor additive adsorbed on non-patterned sample surface regions is achieved in the calculations by setting *k*Co (flat)/*k*Co (patterned) =100, where *k*Co stands for the reaction rate coefficient for the CoED.

R**eferences**

1. Gálvez-Vázquez, M.d.J., Grozovski, V., Kovács, N., Broekmann, P. & Vesztergom, S. Full Model for the Two-Step Polarization Curves of Hydrogen Evolution, Measured on RDEs in Dilute Acid Solutions. *J. Phys. Chem. C* **124**, 3988-4000 (2020).

2. Kovács, N., Grozovski, V., Moreno-García, P., Broekmann, P. & Vesztergom, S. A Model for the Faradaic Efficiency of Base Metal Electrodeposition from Mildly Acidic Baths to Rotating Disk Electrodes. *J. Electrochem. Soc.* **167**, 102510 (2020).

3. Moreno-García, P. et al. Inverted RDE (iRDE) as Novel Test Bed for Studies on Additive-Assisted Metal Deposition under Gas-Evolution Conditions. *J. Electrochem. Soc.* **167**, 042503 (2020).

4. Vesztergom, S. A short introduction to digital simulations in electrochemistry: simulating the Cottrell experiment in NI LabVIEW. *J. Electrochem. Sci. Eng.* **8**, 171-181 (2018).

5. Hessami, S. & Tobias, C.W. In-situ measurement of interfacial pH using a rotating ring-disk electrode. *AIChE J* **39**, 149-162 (1993).
